# Supplementary material for: Genome sequencing and comparative analysis of three Chlamydia pecorum strains associated with different pathogenic outcomes
Source: PubMed Central journal article supplement (PMC3932018; doi:10.1186/1471-2164-15-23), 2014-01-14
Supplement: 12864_2013_7002_MOESM2_ESM.pdf [file 12864_2013_7002_MOESM2_ESM.pdf]

Supplementary Figure 1

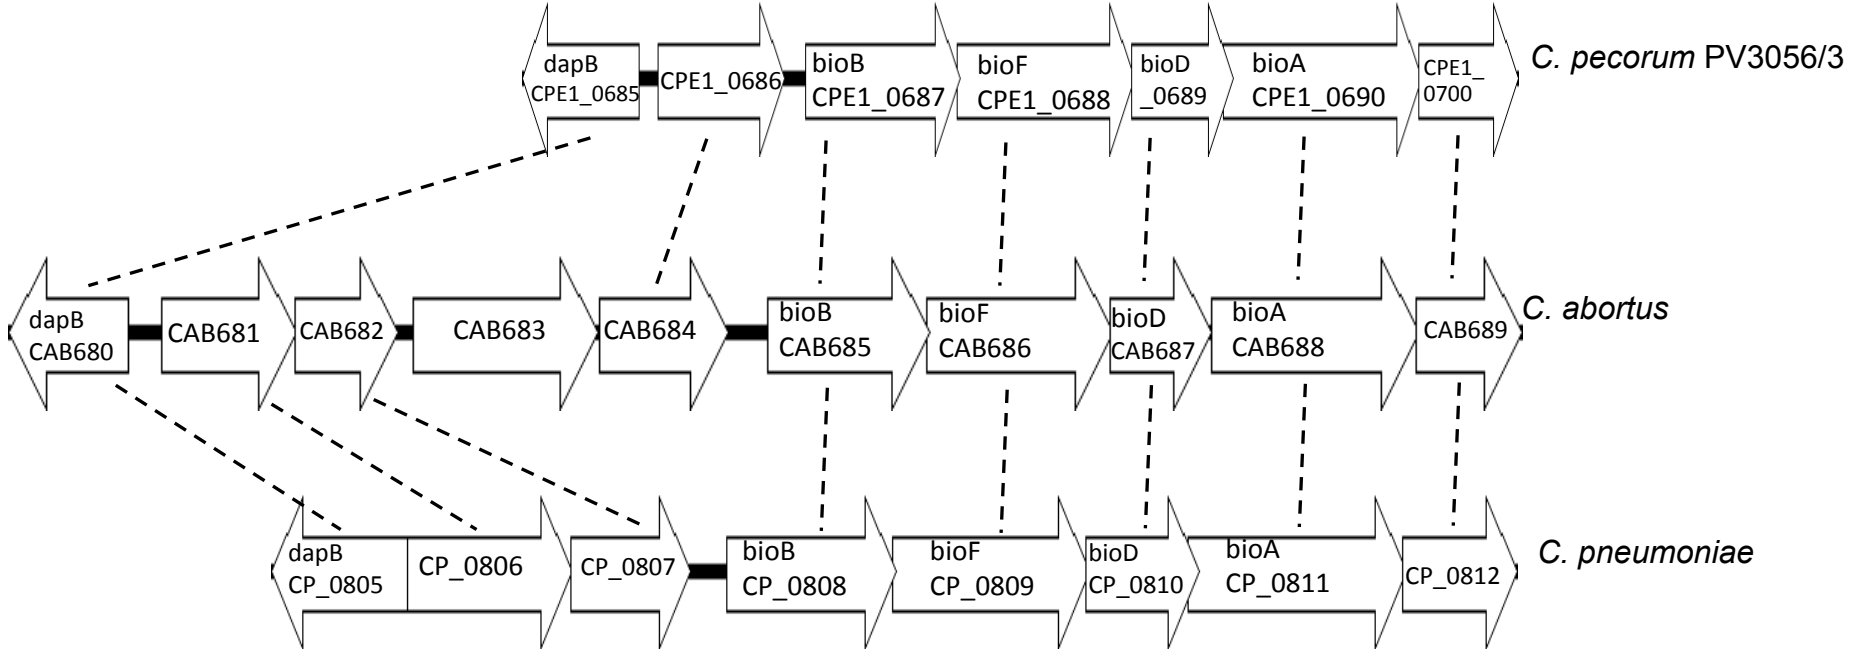



Supplementary Figure 3

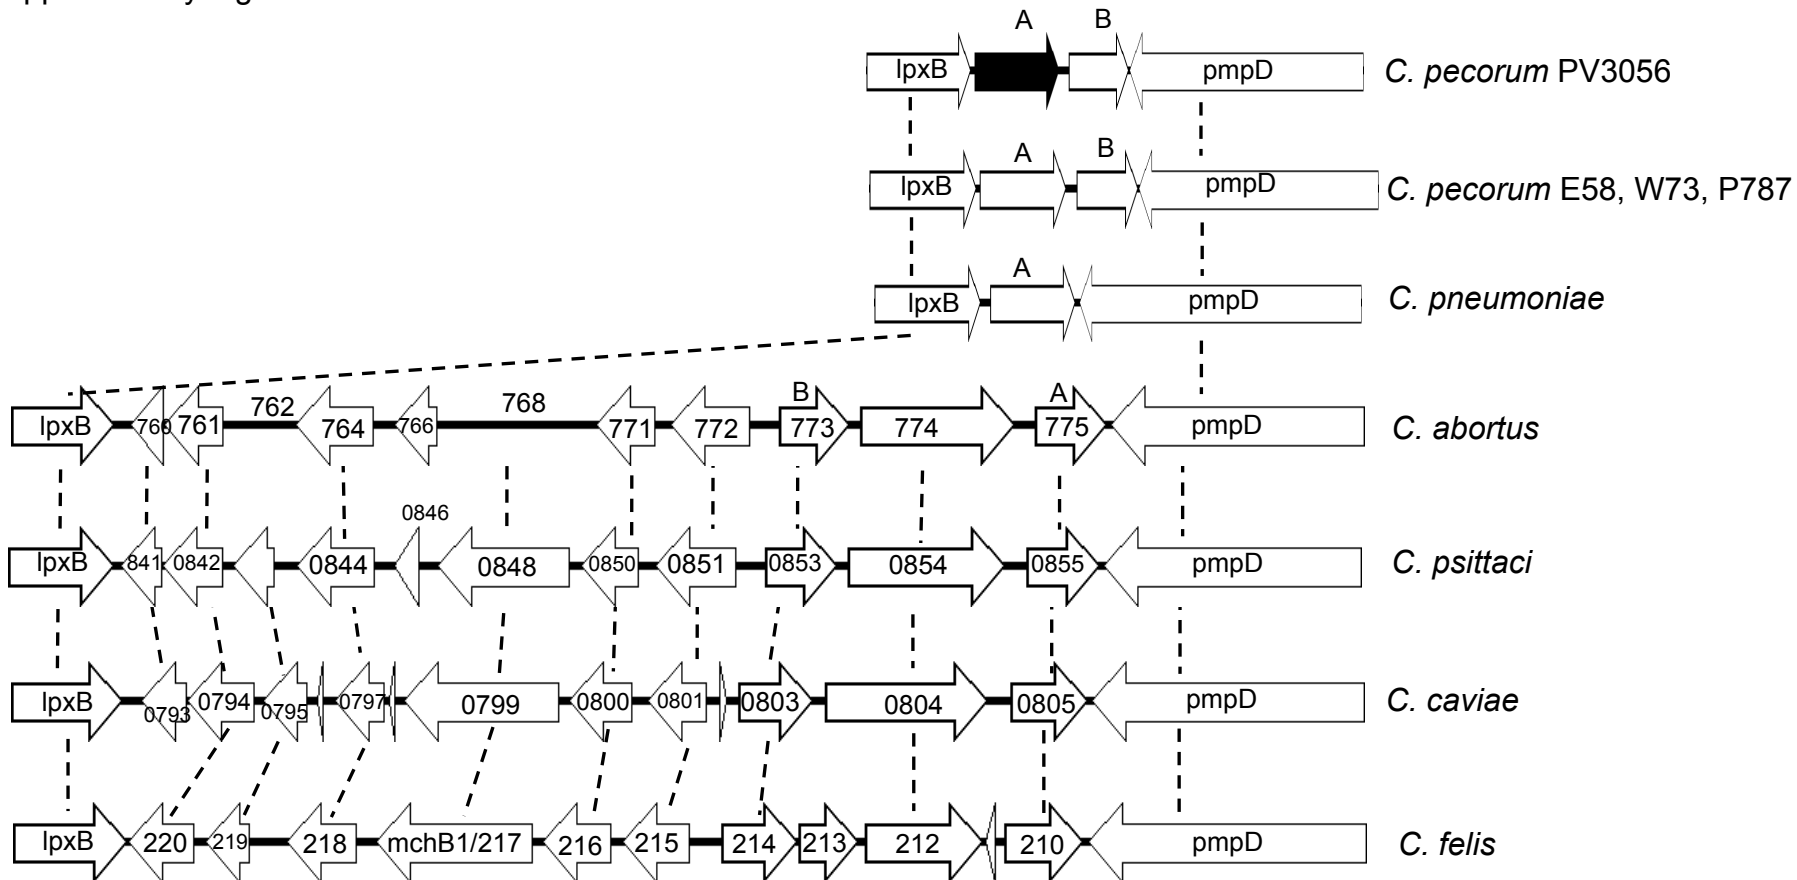

Supplementary Figure 4

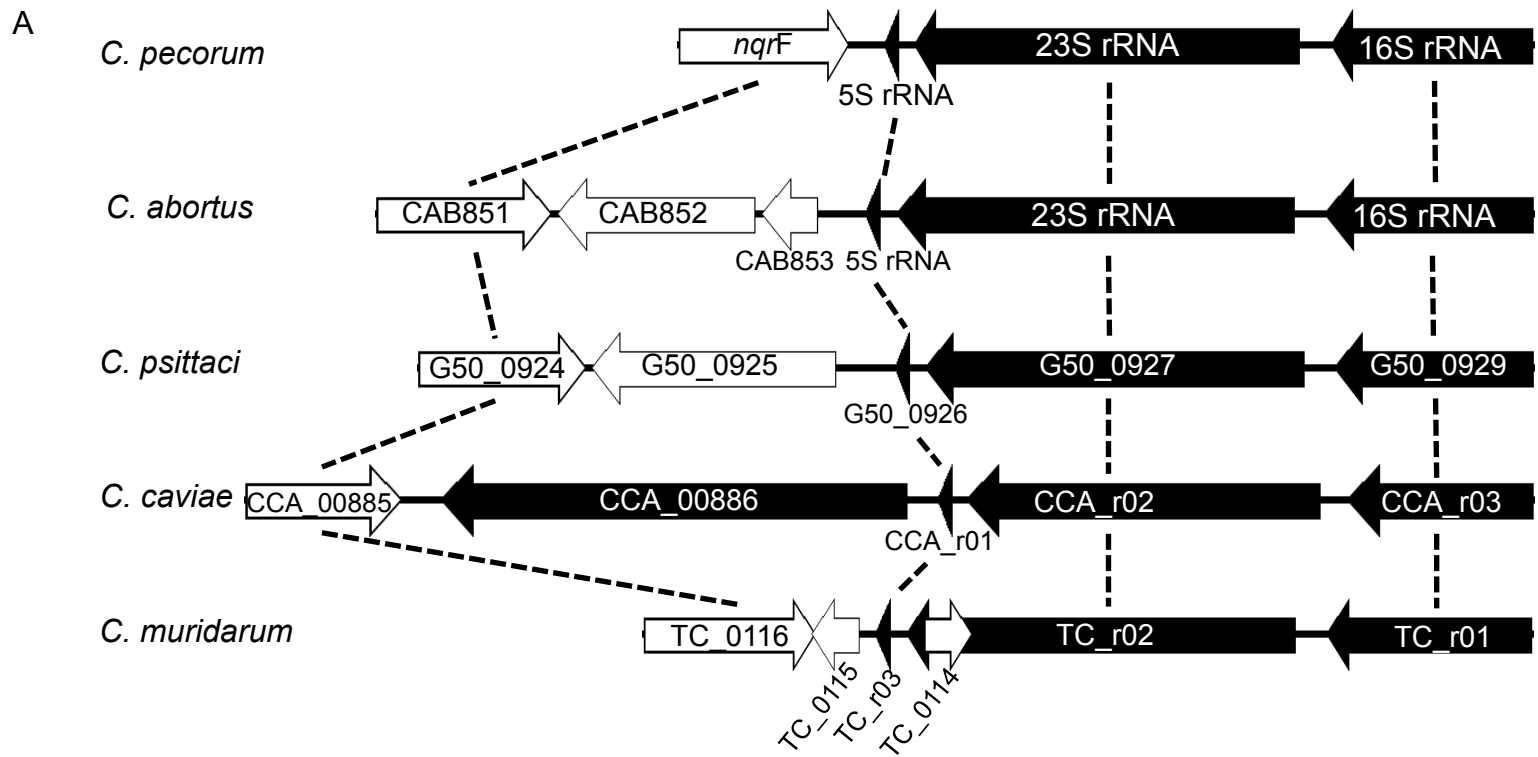

**B**

|          |            |            |            |            |            |            |            |            |            |            |
|----------|------------|------------|------------|------------|------------|------------|------------|------------|------------|------------|
| PV3056/3 | AAAATAAGGC | TATTTTCTAG | -CTTTTTTTT | ATAGACACTC | TTTACCTCC  | -----AAA   | GCACTAAAGC | ACTAAAGCAC | TAAAGCACTA | AAGCACTAAA |
| W73      | AAAATAGCCT | TATTTTCTAG | -CTTTTTTTT | ATAGACACTC | TTTACCTCC  | -----AAA   | GCACTAAAGC | ACTAAAGCAC | TAAAGCACTA | AAGCACTAAA |
| P787     | AAAATAGCCT | TATTTTCTAG | -CTTTTTTTT | ATAGACACTC | TTTACCTCCA | AAGCACTAAA | GCACTAAAGC | ACTAAAGCAC | TAAAGCACTA | AAGCACTAAA |
| E58      | AAAATAGCCT | TATTTTCTAG | TTTTTTTTTT | ATAGACACTC | TTTACCTCC  | -----AAA   | GCACTAAAGC | ACTAAAGCAC | TAAAGCACTA | AAGCACTAAA |
| PV3056/3 | GCACTAAAGC | ACTAAAGCAC | TAAAGCACTA | AAGCACTAAA | GCACTAAAGC | ACTAAAGCAT | AAAATTTAGT | TGAGTCGCAG | AAAAATATGA | AAC-AAAAAA |
| W73      | GCACTAAAGC | ACTAAAGCAC | TAAAGCACTA | AAGCACTAAA | GCACTAAAGC | ACTAAAGCAT | AAAATTTAGT | TGAGTCGCAG | AAAAATATGA | AAC-AAAAAA |
| P787     | GCACTAAAGC | ACTAAAGCAC | TAAAGCACTA | AAGCACTAAA | GCACTAAAGC | ACTAAAGCAT | AAAATTTAGT | TGAGTCGCAG | AAAAATATGA | AAC-AAAAAA |
| E58      | GCACTAAAGC | ACTAAAGCAC | TAAAGCACTA | AAGCACTAAA | GCACTAAAGC | ACTAAAGCAT | AAAATTTAGT | TGAGTCGCAG | AAAAATATGA | AACAAAAAAA |
| PV3056/3 | AAGAGAACAA | AATCGCTTTT | GTCCTCTTTT | CTTAAACTTA | GTCTTATGAC | CAAGGAATCT | TTTATATAAA | A-         |            |            |
| W73      | AAGAGAACAA | AATCGCTTTT | GTCCTCTTTT | CTTAAACTTA | GTCTTATGAC | CAAGGAATCT | TTTATATAAA | A-         |            |            |
| P787     | AAGAGAACAA | AATCGCTTTT | GTCCTCTTTT | CTTAAACTTA | GTCTTATGAC | CAAGGAATCT | TTTATATAAA | A-         |            |            |
| E58      | AAGAGAACAA | AATCGCTTTT | GTCCTCTTTT | CTTAAACTTA | GTCTTATGAC | CAAGGAATCT | TTTATATAAA | AA         |            |            |
